# Supplementary material for: The Role of Socioeconomic Status in the Association of Lung Function and Air Pollution—A Pooled Analysis of Three Adult ESCAPE Cohorts
Source: MDPI journal article supplement (doi:10.3390/ijerph16111901), 2019-05-29
Supplement: s1 [file s1]

# Supplementary Materials: The role of socioeconomic status in the association of lung function and air pollution– a pooled analysis of three adult ESCAPE cohorts

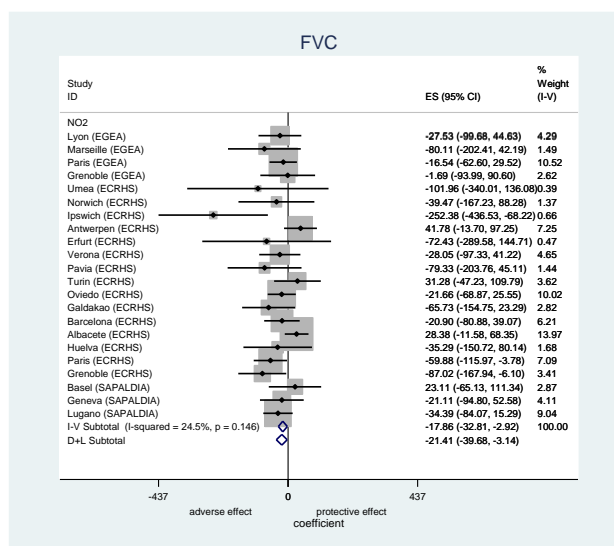

**Figure S1.** Meta-analysis of the association of NO<sub>2</sub> with FVC in the full sample, by study center and overall Forest plot displaying the study area-specific mixed linear regression model estimates of the association of NO<sub>2</sub> (per 10 µg/m<sup>3</sup> increment) with FVC. I-squared: Variation in estimated effects attributable to heterogeneity. I-V Subtotal: Fixed effects model using the inverse variance method, D+L Subtotal: Random effects model using the DerSimonian and Laird method. The mixed linear regression models were adjusted for age, age squared, height, height squared, sex, BMI, BMI squared, smoking status, pack-years, interaction of smoking status and pack-years, pack-years squared, interaction of smoking status and pack-years squared, and education (models M1 + education). Negative estimates indicate lower lung function with increasing exposure. ES: Effect size.

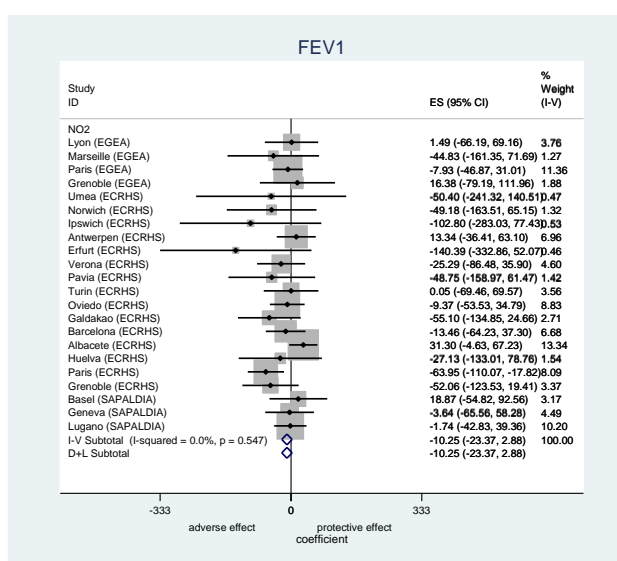

**Figure S2.** Meta-analysis of the association of NO<sub>2</sub> with FEV1 in the full sample, by study center and overall. Forest plot displaying the study area-specific mixed linear regression model estimates of the association of NO<sub>2</sub> (per 10 µg/m<sup>3</sup> increment) with FEV1. I-squared: Variation in estimated effects

attributable to heterogeneity. I-V Subtotal: Fixed effects model using the inverse variance method, D+L Subtotal: Random effects model using the DerSimonian and Laird method. The mixed linear regression models were adjusted for age, age squared, height, height squared, sex, BMI, BMI squared, smoking status, pack-years, interaction of smoking status and pack-years, pack-years squared, interaction of smoking status and pack-years squared, and education (models M1 + education). Negative estimates indicate lower lung function with increasing exposure. ES: Effect size.

**Table S1.** Sensitivity analyses.

| <b>Outcome</b> | <b>Sample</b> | <b>Model</b>                                          | <b>NO<sub>2</sub> (95% CI)</b> | <b>p-value</b> |
|----------------|---------------|-------------------------------------------------------|--------------------------------|----------------|
| FVC            | Full          | Meta-Analysis (fixed)                                 | -17.9 (-32.8; -2.9)            | 0.019          |
| FVC            | Full          | Meta-Analysis (random)                                | -21.4 (-39.7; -3.1)            |                |
| FVC            | Full          | All variables (three-level pooled model) <sup>1</sup> | -16.3 (-31.2; -1.5)            | 0.031          |
| FVC            | Reduced       | All variables (three-level pooled model) <sup>2</sup> | -19.2 (-34.9; -3.5)            | 0.017          |
| FEV1           | Full          | Meta-Analysis (fixed)                                 | -10.3 (-23.4; 2.9)             | 0.126          |
| FEV1           | Full          | Meta-Analysis (random)                                | -10.3 (-23.4; 2.9)             |                |
| FEV1           | Full          | All variables (three-level pooled model) <sup>1</sup> | -12.3 (-24.9; 0.2)             | 0.054          |
| FEV1           | Reduced       | All variables (three-level pooled model) <sup>2</sup> | -16.3 (-30.2; -2.4)            | 0.022          |

n = 6502 (full sample), n = 4766 (reduced sample). For the three-level-models <sup>1</sup> family and <sup>2</sup> neighborhood respectively were considered as additional random effect nested in study area.

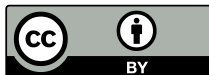

© 2019 by the authors; licensee MDPI, Basel, Switzerland. This article is an open access article distributed under the terms and conditions of the Creative Commons by Attribution (CC-BY) license (<http://creativecommons.org/licenses/by/4.0/>).
